# Supplementary material for: Chitosan Grafted with Thermoresponsive Poly(di(ethylene glycol) Methyl Ether Methacrylate) for Cell Culture Applications
Source: MDPI journal article supplement (doi:10.3390/polym15061515), 2023-03-18
Supplement: s1 [file s1]

Supporting Information

# Chitosan Grafted with Thermoresponsive Poly(di(ethylene glycol) Methyl Ether Methacrylate) for Cell Culture Applications

Natun Dasgupta, Duo Sun, Maud Gorbet, and Mario Gauthier\*

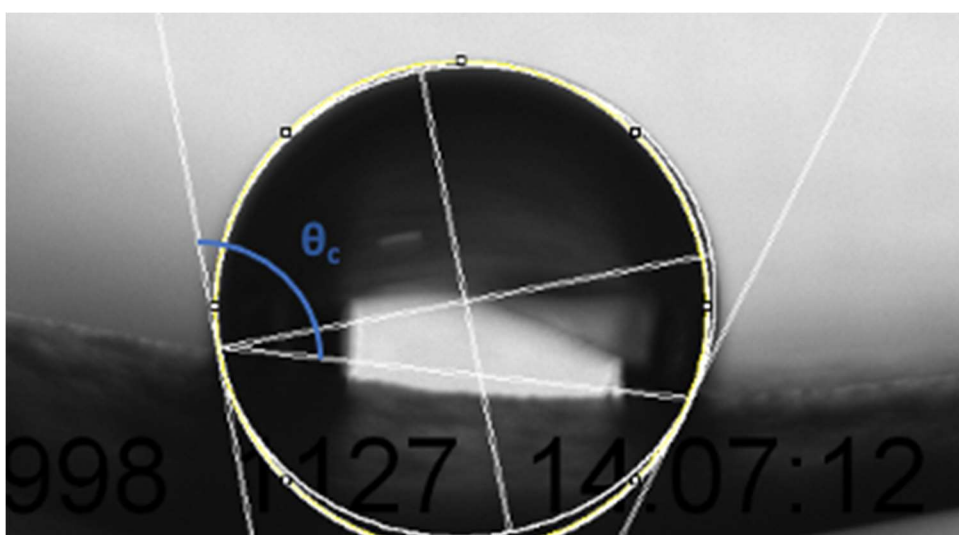

*Figure S1: Sessile-drop contact angle ( $\theta_c$ ) determination using ImageJ.*

**Table S1: Grafting efficiency of PMEO<sub>2</sub>MA to chitosan using Chito-RAFT agent.**

| Sample                                     | Trial | Chito-RAFT agent (W <sub>i</sub> , mg) | MEO <sub>2</sub> MA (W <sub>m</sub> , mg) | Recovered (W <sub>r</sub> , mg) | Average grafting efficiency (%) | Average PMEO <sub>2</sub> MA content (wt%) |
|--------------------------------------------|-------|----------------------------------------|-------------------------------------------|---------------------------------|---------------------------------|--------------------------------------------|
| <b>Chito-g-PMEO<sub>2</sub>MA (15 wt%)</b> | 1     | 110                                    | 19.5                                      | 120                             | 49±2                            | 8.7±1                                      |
|                                            | 2     | 113                                    | 19.9                                      | 123                             |                                 |                                            |
|                                            | 3     | 112                                    | 19.7                                      | 121                             |                                 |                                            |
| <b>Chito-g-PMEO<sub>2</sub>MA (30 wt%)</b> | 1     | 110                                    | 47.3                                      | 132                             | 47±3                            | 20.3±1                                     |
|                                            | 2     | 110                                    | 47.3                                      | 134                             |                                 |                                            |
|                                            | 3     | 113                                    | 48.4                                      | 134                             |                                 |                                            |
| <b>Chito-g-PMEO<sub>2</sub>MA (60 wt%)</b> | 1     | 110                                    | 166                                       | 152                             | 29±3                            | 43±3                                       |
|                                            | 2     | 110                                    | 166                                       | 161                             |                                 |                                            |
|                                            | 3     | 112                                    | 168                                       | 162                             |                                 |                                            |

**Table S2: Comparison of the apparent number-average molecular weights (*M<sub>n</sub>*) obtained by GPC analysis of the cleaved PMEO<sub>2</sub>MA chains.**

| Cleaved Samples                                | <i>M<sub>n</sub></i> from GPC (kg/mol) | PDI  |
|------------------------------------------------|----------------------------------------|------|
| Chito-g-PMEO <sub>2</sub> MA (15 wt%)          | 43                                     | 1.82 |
| Chito-g-PMEO <sub>2</sub> MA (30 wt%)          | 85                                     | 1.71 |
| Chito-g-PMEO <sub>2</sub> MA (60 wt%)          | 128                                    | 1.80 |
| Chito-g-PMEO <sub>2</sub> MA (60 wt%, High DS) | 105                                    | 1.88 |

**Table S3: Contact angle (in degrees) from  $t = 0$  to 4 s for selected samples at 22 and 40 °C.**

| Time (s) | PMEO <sub>2</sub> MA on glass slide |          | SNP-g-PMEO <sub>2</sub> MA (15 wt%) |           | SNP-g-PMEO <sub>2</sub> MA (30 wt%) |           | SNP-g-PMEO <sub>2</sub> MA (60 wt%) |         |
|----------|-------------------------------------|----------|-------------------------------------|-----------|-------------------------------------|-----------|-------------------------------------|---------|
|          | @22 °C                              | @40 °C   | @22 °C                              | @40 °C    | @22 °C                              | @40 °C    | @22 °C                              | @40 °C  |
| 0        | 73±2                                | 88±1     | 75±3                                | 103.7±2   | 95±2                                | 109±1.5   | 91±1.3                              | 102±1.2 |
| 1        | 70.4±1.7                            | 88.7±1.2 | 66±4.8                              | 102.9±3.4 | 92.4±2                              | 107±2     | 92.5±1                              | 100.5±2 |
| 2        | 72±2                                | 89.2±1.5 | 62.7±5                              | 103.5±4.7 | 86.7±4                              | 106.8±2   | 91±1.2                              | 102±2.7 |
| 3        | 73.6±1.5                            | 85.1±2   | 62.2±4.3                            | 102.3±4.9 | 81.7±4.7                            | 106.9±2.1 | 93.2±2                              | 101±3   |
| 4        | 74.8±2.7                            | 85.6±2.6 | 60.2±6                              | 104.8±3.7 | 83.3±3.6                            | 106.6±1.7 | 92.1±3                              | 102±4.2 |

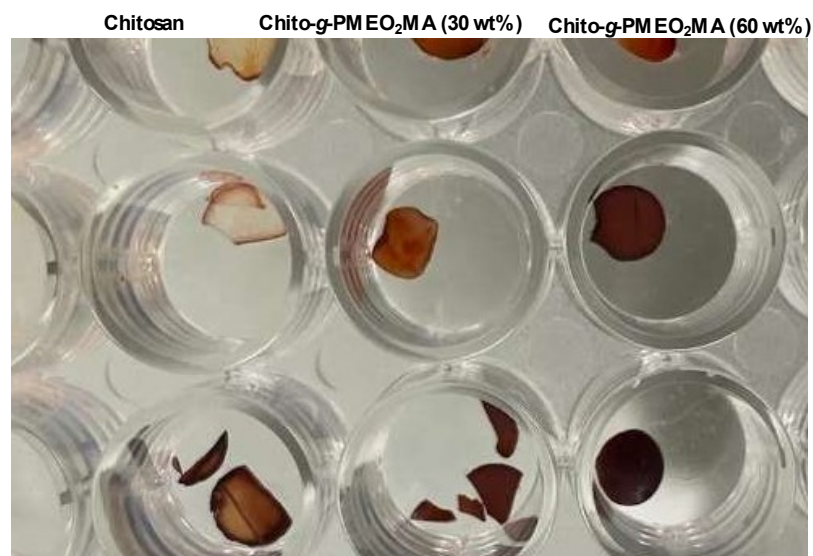

**Figure S2: Sorption of the dye on the films.**

*Table S4: Water uptake index (WUI) of selected chitosan films at 22 °C*

| Sample                                              | Trial | Initial Weight<br>(W <sub>d</sub> , mg) | After Water<br>Uptake (2 h)<br>(W <sub>w</sub> , mg) | Water<br>Uptake<br>Index<br>(WUI) | Average WUI<br>(%) |
|-----------------------------------------------------|-------|-----------------------------------------|------------------------------------------------------|-----------------------------------|--------------------|
| <b>Chitosan</b>                                     | 1     | 24.7                                    | 65.2                                                 | 164                               | 169±5              |
|                                                     | 2     | 40.7                                    | 110.5                                                | 171                               |                    |
|                                                     | 3     | 36.7                                    | 100.1                                                | 173                               |                    |
| <b>Chito-RAFT</b>                                   | 1     | 33.2                                    | 79                                                   | 138                               | 154±29             |
|                                                     | 2     | 28.2                                    | 81                                                   | 187                               |                    |
|                                                     | 3     | 42                                      | 99.4                                                 | 137                               |                    |
| <b>Chito-g-<br/>PMEO<sub>2</sub>MA<br/>(15 wt%)</b> | 1     | 45.3                                    | 122.4                                                | 170                               | 151±17             |
|                                                     | 2     | 34.7                                    | 83.8                                                 | 141                               |                    |
|                                                     | 3     | 30.7                                    | 74                                                   | 141                               |                    |
| <b>Chito-g-<br/>PMEO<sub>2</sub>MA<br/>(30 wt%)</b> | 1     | 39.4                                    | 71.5                                                 | 81                                | 85±4               |
|                                                     | 2     | 34.4                                    | 65.1                                                 | 89                                |                    |
|                                                     | 3     | 42.1                                    | 77                                                   | 83                                |                    |
| <b>Chito-g-<br/>PMEO<sub>2</sub>MA<br/>(60 wt%)</b> | 1     | 34.2                                    | 60                                                   | 75                                | 78±12              |
|                                                     | 2     | 45                                      | 75.1                                                 | 67                                |                    |
|                                                     | 3     | 33                                      | 63                                                   | 91                                |                    |

*Table S5: Water uptake Index (WUI) of selected chitosan films at 37 °C*

| Sample                                              | Trial | Initial Weight<br>(W <sub>d</sub> , mg) | After Water<br>Uptake (2 h)<br>(W <sub>w</sub> , mg) | Water<br>Uptake<br>Index<br>(WUI) | Average WUI<br>(%) |
|-----------------------------------------------------|-------|-----------------------------------------|------------------------------------------------------|-----------------------------------|--------------------|
| <b>Chitosan</b>                                     | 1     | 35.5                                    | 89.8                                                 | 153                               | 158±39             |
|                                                     | 2     | 46.2                                    | 138                                                  | 199                               |                    |
|                                                     | 3     | 41.8                                    | 92.5                                                 | 121                               |                    |
| <b>Chito-RAFT</b>                                   | 1     | 29.7                                    | 73.7                                                 | 148                               | 142±23             |
|                                                     | 2     | 30.5                                    | 66.2                                                 | 117                               |                    |
|                                                     | 3     | 30.3                                    | 79.1                                                 | 161                               |                    |
| <b>Chito-g-<br/>PMEO<sub>2</sub>MA<br/>(15 wt%)</b> | 1     | 36.2                                    | 83.4                                                 | 130                               | 117±12             |
|                                                     | 2     | 27.8                                    | 57.7                                                 | 108                               |                    |
|                                                     | 3     | 24.6                                    | 52.2                                                 | 112                               |                    |
| <b>Chito-g-<br/>PMEO<sub>2</sub>MA<br/>(30 wt%)</b> | 1     | 27.6                                    | 43.4                                                 | 57                                | 61±3               |
|                                                     | 2     | 40.1                                    | 65.8                                                 | 64                                |                    |
|                                                     | 3     | 29.5                                    | 47.6                                                 | 62                                |                    |
| <b>Chito-g-<br/>PMEO<sub>2</sub>MA<br/>(60 wt%)</b> | 1     | 28.5                                    | 45                                                   | 58                                | 55±20              |
|                                                     | 2     | 37.5                                    | 50                                                   | 33                                |                    |
|                                                     | 3     | 27.5                                    | 47.5                                                 | 73                                |                    |
